# Supplementary material
Source: Springer Nature journal article supplement (https://www.springermedizin.de/resource/supplementary/13000_2011_416_MOESM3_ESM.pdf/9624518)

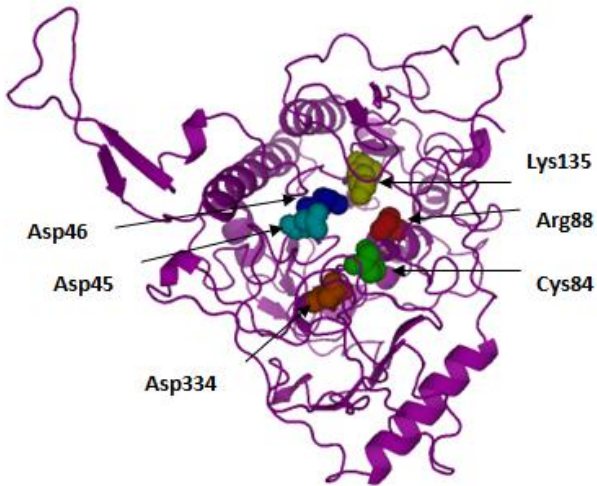

Supplement: MOESM3 [file 9624518]
